## Biomechanics of the peafowl's crest: a potential mechanosensory role for feathers during social displays

Suzanne Amador Kane<sup>\*1</sup>, Daniel Van Beveren<sup>1</sup>, Roslyn Dakin<sup>2,3</sup>

<sup>1</sup> Physics Department, Haverford College, Haverford, PA 19041, USA

<sup>2</sup> Department of Zoology, University of British Columbia, Vancouver, BC V6T1Z4, Canada

<sup>3</sup> Migratory Bird Center, Smithsonian Conservation Biology Institute, P.O. Box 37012, Washington, DC 20013, USA

\*corresponding author: samador@haverford.edu

**Running title:** Biomechanics of peafowl feather crests

**Keywords:** plumage; mechanoreception; vibration; resonance; near-field sensing; peacock; multi-modal signaling

**Summary statement:** Avian crest feathers have mechanical properties that make them suitable for sensing airflows generated during multimodal social displays.

22 **ABSTRACT**

24 Feathers act as vibrotactile sensors that can detect mechanical stimuli during avian flight and  
26 tactile navigation, suggesting that they may also function to detect signals during social  
28 displays. We explored this novel sensory modality using the crest plumage of Indian peafowl  
30 (*Pavo cristatus*). We first determined whether the airborne stimuli generated by peafowl  
32 courtship and social displays couple efficiently via resonance to the vibrational response of  
34 feather crests from the heads of peafowl. Peafowl crests were found to have fundamental  
36 resonant modes with frequencies that could be driven near-optimally by the shaking frequencies  
38 used by peafowl performing train vibrating displays. Crests also were driven to vibrate near  
40 resonance when audio recordings of sounds generated by these displays were played back in the  
acoustic near-field, where such displays are experienced *in vivo*. When peacock wing-shaking  
courtship behaviour was simulated in the laboratory, the resulting directional airflow excited  
measurable vibrations of crest feathers. These results suggest that peafowl crests have properties  
that make them suitable mechanosensors for airborne stimuli generated during social displays.  
Such stimuli could complement acoustic perception, thereby enhancing detection and  
interpretation of social displays. Diverse feather crests are found in many bird species that  
perform similar displays, suggesting that this proposed sensory modality may be widespread, and  
possibly derived from flow sensing in other contexts. We suggest behavioral studies to further  
explore these ideas and their functional implications.

## 42 INTRODUCTION

44 A large body of research in mammals and insects has found that whiskers, antennae, and cerci  
46 play important sensory roles directly related to their vibrational response and mechanical  
48 structures (Barth et al., 2012; Sofroniew and Svoboda, 2015). The similar morphology of  
50 elongated facial feathers in birds raises the question of whether feathers might serve a similar  
52 somatosensory function (Seneviratne and Jones, 2008; Seneviratne and Jones, 2010). Indeed,  
54 feather crests and whisker-like plumes are found in a wide variety of bird species encompassing  
56 many different orders (Seneviratne and Jones, 2010). Most studies of elongated head feathers  
58 have focused on their possible role as sexually- or socially-selected traits during courtship and  
60 dominance interactions (Burley and Symanski, 1998; Hagelin, 2002; Jones and Montgomerie,  
62 1992). However, bird feathers are often coupled to vibration-sensitive nerve endings that can  
64 allow birds to sense and respond to a variety of mechanical stimuli (Brown and Fedde, 1993;  
66 Necker, 1985; Saxod, 1978). Thus, feathers can act as lightweight sensors that provide important  
68 information during flight (Bilo and Bilo, 1978; Brown and Fedde, 1993; Brücker et al., 2016),  
70 tactile navigation (Seneviratne and Jones, 2008; Seneviratne and Jones, 2010), and prey capture  
72 (Cunningham et al., 2011). Indeed, feathers may have evolved to serve such sensory functions  
74 before the evolution of other functions such as thermoregulation and flight (Persons and Currie,  
76 2015).

60 During social displays, many birds also perform behaviors that generate mechanical cues (Clark,  
62 2016). Motions such as flapping or vibrating the wings or tails can produce sounds, airflow  
64 patterns, and substrate vibrations that could function as signals (Bostwick et al., 2009; Clark et  
66 al., 2013; Dakin et al., 2016; Ota et al., 2015). These multimodal displays may stimulate  
68 multiple senses, including visual, acoustic and vibrotactile perception. For example, male Indian  
70 peafowl (“peacocks”, *Pavo cristatus*) attract mates by spreading and erecting the train, a fan-like  
72 array of long, colorful feathers, and performing two different shaking behaviors. First, in the  
74 wing-shaking display, the peacock orients his backside toward nearby females and flaps his  
76 partially unfurled wings at approx. 5.4 Hz. Second, in the train-rattling display, the peacock  
78 faces a female at close range (approx. 1 to 1.5 m) and shakes his tail and train feathers rapidly at  
80 22-28 Hz (mean = 25.6 Hz), causing his train to shimmer iridescently and emit a mechanical  
82 sound (Dakin and Montgomerie, 2009; Dakin et al., 2016; Freeman and Hare, 2015). Train-  
84 rattling performance by peacocks is obligatory for mating success (Dakin and Montgomerie,  
86 2009), and eye-tracking experiments have shown that both wing-shaking and train-rattling  
displays are effective at attracting and holding the peahen’s gaze (Yorzinski et al., 2013).  
Peahens also perform a tail-rattling display at 25-29 Hz in a variety of contexts (Dakin et al.,  
2016), suggesting that feather vibrations might serve other communicative functions as well.  
Peafowl can detect audio playback of train-rattling and wing-shaking recordings filtered to  
remove frequencies > 20 Hz and played back at large distances (5 m) (Freeman and Hare, 2015).

80 The sound generated by animal motions can be thought of as consisting of oscillations in both air  
82 pressure and velocity (Fletcher, 1992; Larsen and Wahlberg, 2017). The most familiar scenario,  
84 called the far-field, occurs when the distance,  $R$ , between the source and receiver is large  
86 compared to both the wavelength of sound,  $\lambda$ , and the size of the source,  $A$  (i.e.,  $R \gg \lambda$  and  $R \gg A$ ). In the far-field, pressure waves dominate and amplitude (sound pressure level or SPL) varies as  $1/R$  and power decreases as  $1/R^2$ , corresponding to an SPL decrease by -3 dB and a power decrease of -6 dB when  $R$  doubles. The near-field corresponds to the case when either of

88 two criteria hold: when the wavelength exceeds  $R$  ( $R \lesssim \lambda$ ; e.g., this can occur for low  
90 frequencies characteristic of locomotion or motions during displays when receivers are nearby  
92 the sender), or when the source (e.g., shaking appendages such as wings, trains or tails) size is  
94 comparable to or exceeds  $R$  ( $R \lesssim A$ ; e.g., this can occur when the receiver is close to the sender  
96 compared to the size of shaking appendages such as wings, trains or tails). In the near-field  
98 regime, particle velocity dominates at very small  $R$  and the decrease in both pressure and  
100 velocity depends on exact source characteristics. While there is no hard distinction between the  
102 near- and far-fields, the pressure contribution gradually increases relative to the velocity field as  
104 the far-field limit is approached. Research on low-frequency vibrational communication mostly  
106 has focused on substrate-borne signals and relatively few studies have considered near-field  
vibrotactile reception of near-field air-borne signals. Near-field communication has been studied  
in aquatic animals, including crustaceans, fish, and whales (Bradbury and Vehrencamp, 2011;  
Butler and Maruska, 2016; Mooney et al., 2016), as well as a wide variety of invertebrate taxa  
(Markl, 1983). In arthropods, near-field airborne signals are detected via tactile as well as  
auditory means, and many species use filiform hairs to detect near-field air velocity for predator  
or prey detection and, in some cases, intraspecies signaling (Barth, 2014; Santer and Hebets,  
2008). It is not yet known whether birds also use non-auditory senses to detect near field  
velocity (airflow patterns) during social displays, or what influence this may have on their social  
interactions.

108 One possible means by which peafowl may sense potential near-field signals is the fan-like crest,  
110 a planar array of feathers oriented in the sagittal plane that is found on the heads of both male  
112 and female peafowl (Dakin, 2011). Each crest feather has a long shaft (rachis) with short, sparse  
114 barbs along its length, and a spatula-shaped “flag” of pennaceous vanes at the distal end (Fig.  
116 1). Although it has been proposed that the peafowl crest may serve as a signal of status (Dakin,  
2011), the crest feather morphology is similar to that of filoplumes, a type of feather with known  
118 mechanical sensitivity (Alibardi, 2009; Lucas and Stettenheim, 1972; Seneviratne and Jones,  
2008) that protrude on the face and head of many bird species. This suggests that the crest may  
120 have a somatosensory function. Moreover, because the peafowl’s region of most acute vision is  
oriented laterally (Hart, 2002), when a peahen gazes at a displaying male, the maximum area of  
her crest feathers also points toward the peacock’s moving feathers. This results in the optimal  
orientation for responding to air motions generated by the displaying bird (Fig. 1A).

122 With this background in mind, we explored the biomechanics of the peafowl crest and its  
124 potential role as a sensor during peacock displays. We would expect bird feathers to have certain  
126 biomechanical properties in order for them to function effectively as tactile airflow sensors. In  
128 particular, they should vibrate efficiently at socially salient frequencies, either to detect shaking  
by a conspecific individual, or as a form of proprioception to provide feedback to the animal  
doing the shaking (Dambach et al., 1983; Kämper and Dambach, 1981). This can be  
accomplished readily via mechanical resonance, the phenomenon whereby an object responds  
with maximum amplitude to a driving force that oscillates at one of its natural frequencies of  
vibration (Smith, 2010). Thus, we expect the feather crests to have a vibrational resonant mode  
130 that can be excited by the frequencies and motions used during social displays, as is the case for  
the feathers used to perform such displays (Bostwick et al., 2009; Clark et al., 2013; Dakin et al.,  
132 2016). To test this hypothesis, we used video-based vibrometry (Davis et al., 2015) to measure  
the resonant frequencies of peafowl feather crests and individual crest feathers, and compared



134 them with *in vivo* train- and tail-rattling shaking frequencies (Dakin et al., 2016). Because  
136 interactions between feathers can influence the resonant frequency and damping, we also  
138 compared the biomechanics of crests to that of isolated feathers (Cummins and Gedeon, 2012).  
To test whether mechanical sound might cause crest motion in females located in the near-field  
of train-rattling peacocks, we measured deflections of crests that were exposed to audio  
playbacks in the laboratory of train-rattling and a white noise control.

140  
142 Next, we considered the peacock's wing-shaking display. Because avian wing flapping during  
flight is known to shed vortices periodically, we hypothesized that the wing-shaking display  
would also result in periodic airflow disturbances that could drive significant crest feather  
144 motion. To test this hypothesis, we used a peacock wing-flapping robot to visualize the response  
of peafowl crests to airflow produced during simulated wing-shaking displays. Together, these  
146 experiments provide a first step to evaluating the potential mechanosensory responses of the  
avian crest during social signalling. We discuss how this can be followed with further behavioral  
148 experiments on live animals.

## 150 **MATERIALS AND METHODS**

### 152 ***In vitro* samples**

154 All measurements and fitted values are reported as means [95% confidence interval] unless noted  
otherwise. A total of  $n = 7$  male and  $n = 8$  female Indian peafowl (*Pavo cristatus* Linnaeus  
156 1758) head crests with the feathers still mounted in skin were purchased from commercial  
vendors. Length and width measurements were made by hand and from digital photographs of  
158 crests and high-resolution scans of single feathers with a ruler included in the sample plane (Fig.  
1). All male crest samples had feathers of uniform length ( $\pm 8\%$ ), whereas the female crest  
160 samples had, on average, 7.0% [2.1, 11.8] of their feathers appreciably shorter than the  
maximum length of the crest. Eight out of 15 crests had all feathers oriented in the same plane  
162 within  $\pm 5^\circ$ ; five of the crests had 7-11% of the feathers unaligned, and two male crests had 22%  
and 50% unaligned feathers, respectively. We used photographs from a previous study (Dakin,  
164 2011) that included a scale to compare the morphology of *in vitro* samples here to that of the  
crests on live birds. The morphological traits compared included length, width and number of  
166 feathers.

168 For mechanical testing, we glued the lower side of the crest skin to a ~2.5 cm cube of balsa wood  
using hot glue (Fig. 1C). An earlier study that compared the resonance of peacock feathers  
170 mounted using rigid balsa wood mounts versus a compliant gel found that the compliant mounts  
resulted in only slightly lower resonant frequencies and reduced amplitudes at frequencies  $> 50$   
172 Hz (Dakin et al., 2016). If the crest feathers were closely clustered, the attached skin was first  
softened in water and the crest was spread to approximate its natural configuration. To study  
174 individual, isolated feathers, we removed all but three feathers (one on each outer edge and one  
in the middle) from two male and two female crests, and analyzed the characteristics of those  
176 remaining feathers.

### 178 **Vibrational dynamics trials**

180 For vibrational dynamics measurements, the feather assembly was mounted on a model SF-9324  
mechanical shaker (Pasco Scientific, Roseville, CA, USA) driven by an Agilent 33120A function  
182 generator (Agilent Technologies, Wilmington, DE, USA) (Fig. S1). Two orthogonal directions  
of the driving force were used: “out-of-plane”, oriented normal to the plane of the crest; and “in-  
184 plane”, oriented parallel to the plane of the crest and in the posterior-anterior axis of the head  
(Fig. 1C). The first orientation (out-of-plane) corresponds to the geometry when a peafowl either  
visually fixates the display by orienting one side of the head towards it, or else drives its own  
186 crest into vibrations by performing a train- or tail-rattling display (Dakin et al., 2016). The  
second (in-plane) orientation recreates the geometry when the front of the head is oriented  
188 towards the display or when the bird bobs its head during feeding or walking. The vibrational  
response spectrum was measured using three linear frequency sweeps with rates validated by an  
190 earlier study of peafowl displays and feather vibrational properties (Dakin et al., 2016):  $0.042 \text{ Hz s}^{-1}$  over 0.5–3.0 Hz;  $0.25 \text{ Hz s}^{-1}$  over 0–15 Hz; and  $1.8 \text{ Hz s}^{-1}$  over 10–120 Hz. Each of the 15  
192 crests was tested three separate times in the out-of-plane orientation at the 0-80 Hz frequency  
range ( $n = 45$  trials). We also ran additional trials, as follows: six crests out-of-plane at 0-120 Hz  
194 ( $n = 18$  trials), five crests in-plane at the 0-80 Hz range ( $n = 14$  trials), and two crests in-plane at  
0-120 Hz ( $n = 2$  trials).

196

### Video analysis

198 We recorded feather vibrational motions using high-speed video filmed with a GoPro Hero 4  
Black Edition camera (720 x 1280 pixels; 240 frames  $\text{s}^{-1}$ ; GoPro, San Mateo, CA, USA). Image  
200 and data analysis were performed using custom programs based on the Matlab 2015a Machine  
Vision and Fitting toolboxes (MathWorks, Natick, MA, USA) available on figshare (Dakin et al.,  
202 2017). To analyze feather motion, we first used auto-contrast enhancement and thresholding to  
track separately the mean position of the crest feather flags and shaker mount vs. time, and then  
204 computed the spectrogram of each object’s tracked position during the frequency sweep using a  
Hanning filter. This yielded the magnitude,  $A$ , of the fast Fourier transform (FFT) at each  
206 vibrational drive frequency,  $f_d$ , which was divided by the shaker drive magnitude,  $A_d$ , at that  
frequency to give the drive transfer function ( $A/A_d$ ). Finally, the drive transfer function was  
208 smoothed over a 1.3 Hz window using a cubic Savitzky-Golay filter and all peaks in the response  
were fit to a Lorentzian function using nonlinear-least squares fitting to obtain the resonant  
210 frequency,  $f_r$ , and full-width-half-maximum,  $\Delta f$ , of the spectral power (Smith, 2010). These fits  
were performed in Origin 8.6 (Originlab, Northampton, MA, USA). The quality factor,  $Q$  (a  
212 measure of how sharply defined in frequency the resonance is), was computed from  $Q = f_r/\Delta f$ .

### 214 Audio playback experiments and analysis

To determine if peafowl crests move detectably due to the near-field airflow of train-rattling  
216 vibrations, we filmed high-speed video of one female and one male feather crest in the near-field  
of a speaker playing audio recordings of peacock train-rattling displays. Two types of playback  
218 stimuli were used: (1) three different train-rattling sequences recorded in the field in a previous  
study (Dakin et al., 2016) from three different displaying peacocks, with mean rattle frequencies  
220 of  $25.0 \pm 1.0 \text{ Hz}$ ;  $25.5 \pm 0.6 \text{ Hz}$ ; and  $24.6 \pm 0.8 \text{ Hz}$ ; and (2) white noise generated by Audacity  
(audacityteam.org; downloaded June, 2017). To ensure that playbacks were in phase over  
222 several seconds, sequences lasting approximately 1.2 s long were edited to contain an integer  
number of rattling periods, and combined to make up a 30 s long audio file.

224

226 Audio recordings were played on a personal computer and amplified using a model 402-VLZ3  
228 mixer (Mackie, Woodinville, WA, USA) and model 120 servo amplifier (Samson Technologies,  
230 Hicksville, NY, USA). An earlier analysis of peacock train-rattling mechanical sound indicated  
232 that these noises were broadband rattles emitted at a rate of ~26 Hz, as opposed to sound waves  
234 with spectral density predominantly in the infrasound (Dakin et al., 2016). We consequently  
236 used a model MR922 speaker (JBL Professional Products, Northridge, California) with a  
238 broadband response that had a 30 cm diameter low frequency driver mounted in an acoustically  
240 absorbing enclosure ( $\pm 10$  dB over 60 Hz-17 kHz). Two crest samples (one male and one  
242 female) with resonant responses determined in the vibrational dynamics trials were studied by  
remounting each crest on a 0.64 cm thick square of plywood attached to a force plate. These  
samples were positioned 30 cm away from the 30 cm diameter speaker face to ensure that the  
samples were in the near-field. To confirm that the broadband nature of the audio resulted in no  
variation in intensity due to near-field interference, we measured average sound pressure levels  
(SPL) near the speaker using a model JTS1357 sound level meter (range: 31.5 Hz-8.5 kHz;  $\pm 2$   
dB accuracy; A-weighting) (Sinometer, Shenzhen, China). No variation was found within  
measurement error ( $\pm 0.3$  dB SPL) at five locations across the speaker's face vertically and  
horizontally and perpendicular to the speaker face. Measurements taken when no audio was  
playing found audible frequency background SPL values of  $54 \pm 0.1$  dB.

244 Relatively few values of the sound intensity generated by bird wing-flapping have been reported  
246 in the literature to use as references for this experiment. Peacock wing-shaking sound levels for  
248 frequencies  $\leq 20$  Hz were reported as 73-79 dB SPL at 4 m, which extrapolates to approx. 79-85  
250 dB SPL at 1 m using far-field scaling (Freeman and Hare, 2015), whereas audible bird wing-beat  
252 sound levels for much smaller species were reported at 64-66 dB SPL and 54-60 dB SPL at 1  
254 kHz and 25 kHz, respectively, at 1.2 m for Eastern phoebes (*Sayornis phoebe*) and chickadees  
256 (*Poecile atricapillus*) (Fournier et al., 2013) and  $\leq 67.6$  dB SPL at approx. 1.0 m for crested  
258 pigeons (*Ocyphaps lophotes*) (Hingee and Magrath, 2009), and ruffed grouse drumming (a wing-  
beating display) corresponded to 66.2 dB SPL at 1 m (Garcia et al., 2012). To compare our  
values with previous work, we Fourier-analyzed a recording of the playback made with a  
Sennheiser ME-62 microphone ( $\pm 2.5$  dB: 20 Hz to 20 kHz; Sennheiser, Wedemark, Germany).  
This indicated that the component of the power spectrum of the playback near the crest  
resonance was only 3.5-11% of the total playback power. Thus, while sound levels measured for  
the audio playbacks in the human audible range were approx. 90-97 dB SPL, we estimate that the  
component due to frequencies near resonance were much lower, approx. 75-87 dB SPL ( $-10 \log$   
(3.5 to 11%)).

260 To minimize direct mechanical coupling via the substrate between the speaker and the samples,  
262 we mounted the speaker separately on the floor and used a Sorbothane™ vibration-isolation pad  
264 under the optical breadboard holding the crest samples. Insertion of an acoustic foam tile  
266 between the feather crests and speaker to block airflow reduced the FFT spectral power at the  
268 resonant frequency of the crests to 6.5% of its value without the tile; the remaining background  
270 vibrations are due to background caused by substrate vibrations and reverberation, as well as any  
pressure waves transmitted through the foam. To find the background noise level due to  
environmentally driven vibrations for use in the Fourier analysis, we also measured crest  
vibrations in the absence of audio playbacks. The background FFT power spectrum peak  
showed a single peak at the resonant frequency with the same power either when measured with

272 no audio playing or when measured during lower intensity playbacks ( $\leq 75$  dB at distances  $\geq 30$   
274 cm).

### 274 **Simulated wing-shaking experiments**

276 High-speed videos from a previous study were used to determine the frequency and amplitude of  
278 wing motions during the peacock's wing-shaking display (Dakin et al., 2016); we used four  
280 videos with the correct perspective that also showed tail feathers with known lengths to estimate  
282 the mean diameter of wing motion circumscribed by the tips of the partly-unfurled wings during  
284 this display as 7.6 cm (range 5.5 to 10 cm; Fig. 4). To simulate the resulting air motions in the  
286 laboratory, we used a robotic mechanism that caused an actual peacock wing to move such that  
288 its plane remained in the same orientation while its distal end circumscribed a circle with the  
290 same rotational circulation as found in living birds (movie 1 and Fig. S2). The peacock wing  
was mounted on a carbon fiber rod using a balsa wood base that was attached to the wing via  
adhesive at the shoulder; this rod pivoted about a clevis joint, which allowed the wing axis to  
move in a vertical circle while the wingspan remained in the vertical plane. At the end opposite  
the wing, the rod was attached to a circular crank by a universal joint. The crank and attached  
wing assembly was driven at  $4.95 \pm 0.05$  Hz by a DC motor. While actual wing-shaking  
involves motions of two wings toward each other, each with diameter 10 cm, which presumably  
displaces more air than a single wing, this apparatus used a single flapping wing moving in a  
slightly larger diameter (14 cm) circle at the wingtips.

292 To determine how wing-shaking influences the crest of an observing bird, we first determined  
294 the location of maximal airflow speed during robotic wing-shaking. Airflow speeds were  
296 measured by a model 405i Wireless Hot-wire Anemometer (Testo, Sparta, NJ, USA) oriented  
298 with its sensor facing in the same direction as the crest samples; this device has a resolution of  
300 0.01 m/s, accuracy of 0.1 m/s, 1 Hz measurement rate, and approx. 5 s equilibration time. To  
302 define the airflow pattern around the flapping wing, air speed was sampled at every point on a 5  
304 cm grid 5-7 times per location. Using to these results, wood-mounted peahen feather crests were  
306 positioned using a tripod at the vertical midline of the wing located at varying distances from the  
308 wing-tips as shown in Fig. S2. The resulting motions of the crests were then filmed using high-  
speed video as described above in "Video analysis" to quantify the vibrational response of three  
different peahen crests. To verify that substrate vibrations did not drive the crest motion, we  
performed a control by inserting a 3 x 4 ft foamboard in between the crest and wing to block the  
airflow from the wing motion; this reduced the root-mean-squared crest motion to 14% of its  
value with wing motion-induced airflow present. For comparison with the wing-shaking  
frequency during displays, flapping frequencies during ascending and level flight were also  
measured for 9 peacocks from 6 online videos (Table S1).

### 308 **Air vortex experiments**

310 To understand further the response of crests to individual airflow impulses, we used a Zero  
312 Blaster vortex gun (Zero Toys, Concord, MA, USA) to generate single air vortex rings of  
314 artificial fog (2-4 cm in diameter, 1 cm diameter cross-section, speed 1.8 m/s [95% CI 1.7, 2.0  
316 m/s, range 1.5 - 2.1 m/s]), aimed so as to impact whole crests ( $n = 2$  peacocks and 1 peahen  
crests) in the out-of-plane orientation. The motion of crest feathers struck by the vortices was  
measured by tracking the crest position on high-speed video when an intact vortex impacted the  
crest oriented with its widest cross-section facing the source at 0.5 m from the point of creation.

## 318 **Force measurements**

319 We studied the static mechanical response of peafowl crests in the single cantilever bending  
320 geometry by measuring the relationship between flag displacement and restoring force of the  
321 crest in the out-of-plane orientation (Fig. 1C). Force measurements were made using a Model  
322 DFS-BTA force sensor (accuracy  $\pm 0.01$  N) connected to a LabQuest2 datalogger (Vernier  
323 Software & Technology, Beaverton, OR, USA), which was calibrated using known masses. The  
324 force sensor was attached to a thin rectangular plastic blade oriented in the horizontal plane. The  
325 edge of the blade was pressed against the midpoint of the flags of the vertically oriented crest to  
326 measure the restoring force exerted by the bent crests. The crests were mounted on a micrometer  
327 which moved them toward the force sensor and enabled measurement of crest displacement  
328 relative to the location at which restoring force first became non-zero. The resulting force vs  
329 displacement data were fit to a linear model to determine the elastic bending constant,  $k$ , for  
330 three trials each for three male and three female crest samples.

331 For the air vortex and audio playback studies, the crest samples were mounted on a balsa wood  
332 block that was mounted on two vertically-oriented force probes at either end separated by  $3.0 \pm$   
333  $0.1$  cm. Since the flags are approximately 5 cm from the base, the mean force on the crest  
334 feather flag,  $F$ , can be computed from  $\Delta F$  (the difference between the downward forces recorded  
335 by each sensor) using  $F = (5/1.5) \Delta F = 3.3 \Delta F$ .

## 338 **Statistical analysis**

339 To analyze sources of variation in whole crest  $f_r$  and  $Q$ , we fit Gaussian linear mixed effects  
340 models with a random effect of crest ID to account for repeated measures of each bird's crest  
341 using the nlme package (Pinheiro et al., 2017) in R (R Core Team, 2017). We first verified that  
342 trial order and frequency sweep rate, two aspects of the experimental design, did not have  
343 significant effects on either  $f_r$  or  $Q$  (all  $p > 0.28$ ). The next step was to evaluate the potential  
344 effects of morphological traits that could influence crest resonance. Because we had only 15  
345 crests, we considered models with one morphological trait fixed effect at a time, selected from  
346 the following list of traits: length, width, number of feathers, percent of unaligned feathers, and  
347 percent of short feathers. All models also included fixed effects of the vibration orientation (in  
348 or out-of-plane), as well as sex. We used AICc to select the best-fit model (Bartoń, 2015) and  
349 evaluated significance of the fixed effects in that model using Wald tests. We report  $R^2_{\text{LMM}(m)}$  as  
350 a measure of the total variance explained by the fixed effects (Bartoń, 2015; Nakagawa and  
351 Schielzeth, 2013). We used the variance components of the best-fit model to calculate the  
352 repeatability of measurements after accounting for variation explained by the fixed effects  
353 (Nakagawa and Schielzeth, 2010). Inspection of the data and model residuals revealed that  
354 variance in  $f_r$  differed among crests, so when modelling  $f_r$ , we specified this heteroscedasticity  
355 using the weights argument (Pinheiro et al., 2017).

356

## **RESULTS**

358

### **Morphology**

359 Fig. 1D shows that the range of lengths of dried feather crests measured in this study agreed with  
360 that of live peafowl, indicating that the crest samples used in the experiments were fully grown  
361 (Dakin, 2011). However, the widths of the mounted crests were approx. 20% (female) to 27%

362



(male) smaller than those found on live birds (Fig. 1D). This difference could be due to the crest ornament being spread 1-2 cm in the sagittal plane by muscle action in the live bird, similar to erectile crest plumage in many other species (Hagelin, 2002), in addition to the effect of skin drying.

We also studied the morphology of individual crest feathers to understand their unusual structure (Fig. 1E). The average rachis tapered evenly over its 39.90 [38.89, 40.91] mm length and had a mass of 5.1 [4.8, 5.3] mg, and the plume (or flag) added another 2.5 [0.87, 4.06] mg. Unlike the fully formed barbs in the pennaceous flag, the lower barbs were short (4.1 [3.0, 5.2] mm) and lacked barbules altogether.

### 374 **Vibrational Dynamics**

The vibrational drive transfer functions of peafowl crests had either a single dominant fundamental peak, or in a few cases a cluster of peaks in a narrowly-defined frequency range, with no evidence that other modes of vibration caused detectable motions of the pennaceous flags. Each main peak agreed well with the fitted Lorentzian function (mean adjusted- $R^2 = 0.97$ ; range [0.91, 0.998]). The value of  $f_r \pm \Delta f/2$  defines the approx. range of drive frequencies over which power is efficiently coupled into the oscillator. Fig. 2 shows that shaking frequencies measured in the field for displaying male and female peafowl (Dakin et al., 2016) lay within  $f_r \pm \Delta f/2$  for both sexes. For the shaking force oriented out-of-plane, the mean crest resonant frequency,  $f_r$ , was 28.07 [28.01, 28.14] Hz for female and 26.3 [25.9, 26.6] Hz for male crests, respectively. The mean  $\Delta f$  values were 6.2 [4.4, 8.0] Hz (females) and 4.3 [4.2, 4.4] Hz (males).

Analysis of the sources of variation in  $f_r$  indicated that 28% of the variation in the resonant frequency could be explained by sex, crest orientation, and the total area of the pennaceous flags (Fig. 2). The effect of crest orientation was strong and significant, such that out-of-plane vibrations have approx. 2.4 Hz higher  $f_r$  on average ( $p < 0.0001$ ), whereas the sex difference was not significant ( $p = 0.87$ ) and crests with reduced flag area have a slight but non-significant tendency to have higher  $f_r$  values ( $p = 0.10$ ). Although length, width, number of feathers, and percent of unaligned and short feathers did not explain variation in crest  $f_r$ , the repeatability of crest  $f_r$  was very high at 94%, suggesting that other characteristics may contribute to the consistent differences among individual crests.

The sharpness of the crest's resonant frequency is indicated by the quality factor,  $Q$ . The mean  $Q$  for peafowl crests vibrated in the out-of-plane orientation (grand mean 6.2 for males, 4.8 for females) was intermediate between those of peafowl eyespot feathers ( $Q = 3.6-4.5 \pm 0.4$  and  $1.8 \pm 0.3$ , for individual feathers and feather arrays, respectively) and the tail feathers that drive the shaking, for which  $Q_I = 7.8 \pm 0.5$  (Dakin et al., 2016), indicating that peafowl crests are moderately-tuned resonators. The quality factor values also have implications for undriven vibrations, such as those caused by single gusts of air. These undriven vibrations take place at the crest's natural frequency,  $f_o = f_r \sqrt{1 - 1/2 Q^2}$ ; this results in an undetectably small shift ( $\leq 1.2\%$ ) relative to measurement errors for our measured  $Q$  values of peafowl crests. We discuss the effect of this level of damping on the time behavior of feather vibrations below.

Approximately 49% of the variation in crest  $Q$  could be explained by sex, crest orientation, and the total area of the pennaceous flags (Fig. 2). Male crests were significantly more sharply-tuned



410 than those of females ( $p < 0.0001$ ), and crests that had less flag area tended to be more sharply-  
411 tuned as well ( $p = 0.03$ ). Peafowl crests also have more sharply-tuned resonance when they are  
412 vibrated out-of-plane ( $p < 0.0001$ ) as compared to the in-plane orientation. The repeatability of  
 $Q$  was moderate, at 47%.

414 To determine the response of individual crest feathers, we removed all but three feathers (the two  
415 outermost and middle) for three of the crests studied above (two male and one female). The  
416 frequency response of individual feathers was generally consistent with that of the intact crests,  
417 as the average resonant frequency for individual male feathers was 26.88 [22.90, 30.87] Hz and  
418 25.47 [18.52, 32.42] Hz for the female crest feathers. Additionally, this analysis revealed a sharp  
419 difference between single feathers that were aligned with the whole crest (where the direction of  
420 vibrational motion is out-of-plane) and those that were not aligned. The average resonance for  
421 the aligned feathers was 29.88 [27.36, 32.39] Hz in males and 27.16 [21.26, 33.07] Hz in  
422 females, whereas the unaligned feathers resonated at 21.89 [33.07, 21.26] Hz for the male crests  
423 and 22.09 [N/A] Hz for the females.

424 The average  $\Delta f$  was 4.81 [2.88, 6.75] Hz for male crests and 4.61 [0.66, 8.56] Hz for female  
425 crests. Just as for the resonance, there was a sharp divide between aligned and unaligned  
426 feathers after the majority of the crest feathers were removed. For the male crests, the aligned  
427 feather average was 6.35 [5.29, 7.42] Hz and the unaligned average was 2.25 [1.44, 3.07]  
428 Hz. The averages for the female crest feathers were 5.63 [5.33, 5.92] Hz and 2.59 [NA] Hz for  
429 aligned and unaligned, respectively.

### 432 **Audio playback experiments**

433 An example power spectrum for the vibrational response of a peahen crest during audio playback  
434 is shown in Fig. 3. For audio files played back at in the near-field of the speaker, the vibrational  
435 power spectra of the peafowl crests had a peak well above noise near the resonant frequency for  
436 all but the white noise signal, for which there was no measurable response above noise. In each  
437 case measured, the peak frequency of crest vibrations exceeded the resonant frequency of the  
438 crest by  $4 \pm 2$  (male) to  $4.5 \pm 0.2$  (female) Hz (mean  $\pm$  SE). This shift toward higher frequencies  
439 was greater than the  $\leq 0.3$  Hz shift expected from the playback system's low frequency roll-off,  
440 but it was smaller on average than the width,  $\Delta f$ , of the crest's vibrational resonant response  
441 (90%  $\Delta f$  for female and 66-125%  $\Delta f$  for the male crest).

### 442 **Wing-shaking experiments**

443 The simulated wing-shaking experiment resulted in an airflow pattern with speeds  $\leq 0.3$  m/s.  
444 We used the measured positions of maximum airflow speed to determine the locations for three  
445 female crests for vibrational motion studies. Up to a maximum distance of approx. 90 cm (one  
446 sample) and 80 cm (two samples) from the mean wingtip position, the FFT power spectra of the  
447 crest flag vibrational motion resulted in a peak (Fig. 4) that agreed with the wing-shaking  
448 frequency within 95% CI. One crest had a lower power peak at the resonant frequency ( $29.0 \pm$   
449  $0.1$  Hz vs.  $f_r = 27.1 \pm 0.2$  Hz) for the greatest distances measured; a few samples also showed  
450 peaks with weak power at the first harmonic of the shaking frequency.

451 The average peacock wing-flapping frequency during ascending and level flight was  $5.53 \pm 0.30$   
452 Hz (mean  $\pm$  SE) (Table S1). This frequency agrees with the average frequency of 5.4 Hz (range  
453  
454

456 4.5-6.9 Hz) found for wing-shaking display frequencies measured in the field (Dakin et al.,  
2016).

### 458 **Air vortex experiments**

460 When ring-shaped air vortices traveling at approx. 1.4 m/s impacted the crests, the barbs  
462 responded with clearly visible motion on video with the average amplitude of motion at the flags  
of 9.4 [4.3, 14.4] mm (Fig. 5A). Analysis of the free vibrational displacement of the crests over  
464 time revealed an exponentially decaying sinusoidal response with a frequency that agreed closely  
with the measured resonant frequency of each crest (Fig. 5B). Thus, vortices cause the feather  
crest to vibrate at its natural frequency, with a decrease in amplitude of approx. 13% after 0.2 s  
(the approx. period of peafowl wing-shaking displays).

466 We were unable to detect any forces above noise during either audio playbacks or vortex impact  
468 experiments, indicating that the forces exerted on the crests were  $\leq 0.03$  N.

### 470 **Mechanical bending properties**

472 All feather crests exhibited an elastic response in the bending experiments: force and  
displacement were linearly related for displacements up to 10.1 [9.1, 11.0] mm (adjusted  $R^2 =$   
0.983 [0.975, 0.990] for males, 0.984 [0.975, 0.993] for females), allowing us to compute the  
474 bending spring constant,  $k$ , from the fitted slopes (Fig. 6). The mean static bending spring  
constants for the individual crests ranged from 0.0022 to 0.0054 N/mm with a measurement  
476 repeatability of 47%. Two out of three male crests had values of  $k$  that were higher than any of  
the measurements for the peahen crests, but the difference between sexes in this small sample of  
478 3 male and 3 female crests was not statistically significant ( $p = 0.09$ ).

480

## 482 **DISCUSSION**

484 The findings from this study on peafowl point to a possible role of their feather crests for sensing  
airborne signals generated by their social motor displays. Morphometrics confirmed that the  
486 crests of different individual peafowl are relatively uniform in length and area, as previously  
found in live birds (Dakin, 2011). This structural uniformity helps explain their well-defined and  
narrow vibrational resonances (Fig. 2). We performed several different biomechanical  
488 experiments to understand whether the vibrational mechanics of peafowl crests were consistent  
with a sensory role. The fundamental resonant vibrational frequencies of peafowl crests agreed  
490 closely with the frequencies used during male train-rattling and female tail-rattling displays.  
This similarity seems unlikely to be due to coincidence, given the wide range of vibrational  
492 fundamental frequencies found for feathers of various lengths and structures in prior studies: for  
example, approx. 1 to 25 Hz in (Dakin et al., 2016) and  $\geq 1$  kHz in (Bostwick et al., 2009) and  
494 (Clark et al., 2013). This finding also indicates that peafowl crests can be driven efficiently by  
stimuli caused by their social displays. To further test this hypothesis, we examined the response  
496 of crests to audio playback of train-rattling sounds, and verified that train-rattling caused the  
crests to vibrate detectably near-resonance, whereas white noise resulted in no measurable  
498 vibrations above background noise levels.

500 Since there were no resonant modes of peafowl crests close to the 5 Hz frequency of peacock  
502 wing-shaking displays, we were interested to find that the wing-flapping motions used to  
simulate this display in the laboratory also resulted in crest deflections of several mm at a  
504 distance approx. 50 cm from the wing-tips. This implies that airflow impulses generated by the  
wing-shaking display can also stimulate the feather crests of nearby females. To understand the  
506 crest response at a frequency so far from resonance, we measured the deflection of peafowl  
crests when they were struck by individual air vortices. As expected from their relatively low  
508 values of quality factor,  $Q$ , we found that the crests vibrated near resonance only briefly and  
returned close to equilibrium after a time comparable to the period of peacock wing-shaking  
510 displays. Thus, the airflow due to wing-shaking constitutes a series of essentially distinct  
impulses that can drive detectable crest responses when air flow disturbances are of sufficient  
512 magnitude. One implication of this result is that hybrid biomimetic structures using a  
combination of feathers and resistance-based flex sensors provide a novel approach to making  
514 sensitive detectors for sensing impulsive or periodic airflows. Such devices are required for  
proposed robotic applications of air vortex rings and other airflow signals as a communication  
516 channel (Russell, 2011). Interestingly, peacocks also tilt their trains fore-and-aft during train-  
rattling at approx. 1 Hz, although we have not yet tested whether the airflows generated by these  
518 slower maneuvers can also influence the crest.

Static mechanical tests also showed that the peafowl feather crest flags deflected linearly with  
520 bending force. This indicates that the results measured for high magnitude airflows, sound  
pressure waves, and shaking forces can be extrapolated to the regime of lower-amplitude driving  
522 forces that might correspond to actual peafowl displays. This suggests that the magnitude of  
deflections found when feather crests were exposed to either wing-shaking or audio playbacks  
524 are not inconsistent with a sensory role, given that the combined effects of amplification via  
mechanical resonance and neural processes result in exquisitely small thresholds for animals that  
526 detect flows using mechanosensors. For example, in mammals, hair cells are sensitive to sub-  
nanometer displacements and 0.01 deg rotations (Crawford and Fettiplace, 1985), tactile  
528 receptors in human skin are sensitive to vibrational amplitudes well under a micron (Lofvenberg  
and Johansson, 1984), pigeons can detect submicron threshold vibrational amplitudes applied to  
530 flight feathers (Hörster, 1990), and insect filiform hairs are sensitive to airspeeds as low as 0.03  
 $\text{mm s}^{-1}$  (Shimozawa et al., 2003). Further histological and electrophysiological studies of the  
532 receptors at the base of avian crest feathers are needed to determine their sensitivity to the types  
of stimuli studied here.

534 The hypothesis that feathers might help detect airborne signals also suggests a new way to  
536 conceptualize behavioral experiments on birds that produce low frequency sound. Such studies  
have tended to assume that these signals can be reproduced suitably by a distant source. Indeed,  
538 greater distances often have been emphasized in experiments on signals emitted at low-  
frequencies because of their potential as an effective means of long-distance  
540 communication. For example, capercaillie males produce mechanical sound when they perform  
“flutter-jump” wing-shaking displays (Lieser et al., 2005). Experiments designed to study this  
542 behavior found no behavioral response when females were exposed to playbacks of the  
infrasound ( $< 20$  Hz) component of flutter-jump recordings produced by speakers located 5 m  
544 away (Freeman and Hare, 2011; Lieser et al., 2006; Manley et al., 2011). In another study,  
peafowl were observed to perceive and respond behaviorally to playbacks of the infrasound

546 components of train-rattling and wing-shaking recordings using rotary subwoofers located 5-20  
548 m away from the birds studied (Freeman and Hare, 2015). Behavioral studies of auditory  
550 thresholds indicate that that some bird species (chickens and pigeons, but not budgerigars or  
552 ducks) can detect low frequency sounds < 20 Hz with their ears (Heffner et al., 2013; Heffner et  
554 al., 2016; Hill, 2017; Hill et al., 2014); these studies also argue that eardrum perforation  
556 experiments prove that these birds lack the ability to detect sound by mechanosensory means.  
558 However, all of these studies probed only the far field given the experimental design. Thus, they  
560 were designed appropriately for determining the detection by hearing of the pressure-wave  
562 components of the acoustic signal, but not the effect of near-field airflow component on nearby  
receivers. It would be of great interest to study birds that produce sound with a low frequency  
component by vocal and mechanical means using near-field study designs. For example,  
cassowaries produce sound with fundamental frequencies of 23 or 32 Hz using vocalizations that  
make their entire bodies vibrate; humans are reported to both hear and feel these vibrations,  
suggesting that this sound likely produces tactile airflow or substrate vibration signals in  
conspecifics as well (Mack et al., 2003). In the future, audio playback experiments should be  
conducted in both the far- and near-fields to explore the possibility of such signals being  
transmitted via airflow rather than far-field pressure waves.

564 Peafowl are not the only bird species that have crests and perform shaking displays; for example,  
566 we have compiled a list of at least 35 species distributed over 10 avian orders (Table S2). Given  
568 that feathers function as airflow sensors during flight, it is easy to imagine how they could be co-  
570 opted to function as sensors during social signaling. Birds from diverse species spanning several  
572 orders are known to have filoplumes on their heads that extend past the contour feathers  
(Childress and Bennun, 2002; Clark and de Cruz, 1989; Imber, 1971; James, 1986). Many  
574 external stimuli and animal motions produce incidental sounds and airflows that could stimulate  
576 these feathers, and eventually be adapted to communicative uses. The congruence between  
578 peacock wingbeat frequencies in flight and during wing-shaking displays is consistent with this  
580 scenario. The sound and air-flow signals associated with such motions can be associated with  
582 kinematic parameters that may serve as signals of muscular performance, such as wingflap  
584 frequency, amplitude, and/or duration (Clark, 2016). One can also imagine hitherto unsuspected  
functions in addition to signal detection. For example, if feather crests allow birds to detect wind  
speed and direction, this could be useful for stabilization during flight or during roosting when  
the eyes are closed. Because predators that hunt by scent tend to approach prey from downwind,  
the ability to sense wind direction may be a useful anti-predator adaptation (Conover,  
2007). Such a wind sensor should be flexible enough to provide sensitivity via detectable  
deformations for airflows in the range of interest, but rigid enough so its maximum bending  
occurs outside the range of typical airflow magnitudes. Many feather crests of birds meet these  
criteria. Of course, the fact that a particular species' feather crest is used for some function  
doesn't mean that its shape has evolved primarily in response to that function.

586 Our results raise the important question of whether peafowl respond behaviorally to near-field  
588 airflow signals detected by the crest. Further experiments could test this by removing or altering  
590 the crest and examining the effect on response to courtship displays, and/or performance during  
flight, roosting, and/or predator avoidance. One way to do this would be to paint the crest  
feathers with a clear varnish, because this should shift the resonant responses of the crest without  
changing its appearance visually or adding substantially to its mass. Other experimental

592 approaches might involve measuring the response of peafowl to puffs of air directed toward  
594 specific regions of their plumage, to see how this influences attention and body orientation.  
596 Also, the airflow patterns generated by wing-shaking peacocks could be determined and  
596 compared to the movement of females during this display, to test whether specific female  
596 movements are induced by male actions.

598 Thus far, the elaborate shape and size of bird feather crests has led to an emphasis on their visual  
598 appearance. Many avian courtship displays also involve wing-shaking, tail-fanning and  
600 mechanical sound production that may be detected by nearby females in the vibrotactile channel  
600 (Table S2). Given the growing interest in multisensory signaling, it seems worth pursuing  
602 behavioral studies to investigate the possibility of vibrotactile stimulation. For example,  
602 experiments have shown that that male African crickets signal to females using air vortices  
604 produced by wing flicks that are detected by hair-like cerci (Heidelbach and Dambach, 1997;  
604 Heinzel and Dambach, 1987; Lunichkin et al., 2016). Other arthropods use mechanoreception  
606 for predator or prey detection, and both insects and arachnids communicate via airflow tactile  
606 signals (Markl, 1983; Santer and Hebets, 2008; Steinmann and Casas, 2017). The close match  
608 between the biomechanics of peafowl crests and peafowl social displays suggest that it is time to  
608 explore whether birds use their feathers for vibrotactile sensing in similar ways.

610

## 610 **FIGURE LEGENDS**

612

612 **Fig. 1. Peafowl crest feathers have a morphology suitable for detecting mechanical signals**  
614 **during displays.** (A) A peahen (foreground) with the plane of her crest oriented towards the  
614 displaying peacock (background) as he performs train-rattling vibrations. (B) Both sexes have a  
616 crest with an inverted pendulum shape made up of approx. 20-31 feathers. This photo shows an  
616 adult male measured *in vivo*. (C) A whole crest sample mounted for the laboratory experiments.  
618 The two directions considered for vibrational motions (in and out of the crest plane) are  
618 indicated. (D) Morphology of the whole crest samples as compared to that of live peafowl  
620 crests. Crests measured *in vivo* (shown to the right of the dried sample data) were similar to the  
620 dried samples, although on live birds the crests tended to be wider. Dried samples were  
622 measured to the nearest 0.1 cm. (E) A single crest feather showing the pennaceous flag at the  
622 distal end. Note that only short, thin barbs are present on the relatively bare rachis (shaft) on the  
624 proximal end.

626 **Fig. 2. Vibrational resonance properties of peafowl crests and individual crest feathers.**  
626 (A) Vibrational spectrum and Lorentzian fit for a peacock crest. (B) The resonant frequency,  $f_r$ ,  
628 of the crest is a close match for the range of vibrational frequencies used during peafowl social  
628 displays. As an indication of measurement error, the average 95% CI for each  $f_r$  estimate spans  
630 0.072 Hz. The gray shaded area is the range of vibrational frequencies of the train-rattling  
630 display, with dotted lines showing the means for displays performed by peacocks (blue) and  
632 peahens (green) (Dakin et al., 2016). Variation in  $f_r$  was influenced by the vibrational orientation  
632 and was also associated with the sex of the bird and the area of pennaceous flags at the top of the  
634 crest (although the association with flag area was not statistically significant). (C) The quality  
634 factor,  $Q$ , was also influenced by the vibrational orientation, and was associated with the sex of  
636 the bird and the area of pennaceous flags. The average 95% CI for each  $Q$  estimate spanned  
636 0.233. Black horizontal lines in (B-C) are means.



638

**Fig. 3. Effect of audio playback on crests.** Vibrational response of a peahen crest exposed to peacock train-rattling audio playbacks in the near-field of the speaker. The FFT spectral power for the peahen crest during playbacks peaked near the resonant frequency of the crest.

642

**Fig. 4. Effects of simulated wing-shaking displays.** Vibrational response of a female peahen crest exposed to airflow from a robot that simulated 5.0 Hz peacock wing-shaking displays at a distance 50 cm from the moving wingtip (Fig. S2).

646

**Fig. 5. Displacement of the crest in response to air vortices.** (A) Time series showing the change in flag position after a peacock crest is impacted by a vortex of air created by a gun. When peafowl crests were impacted by air ring vortices, they deflected measurably, oscillating at their resonant frequency with an amplitude that decayed to a few percent of the initial value over the period of the peacock's wing-shaking display. (B) Resonant frequencies ( $f_r$ ) and vortex response frequencies ( $\pm 95\%$  CI) for three crests in the vortex experiment.

652

**Fig. 6. Mechanical properties of the crests of male and female peafowl.** (A) Bending spring constant,  $k$ , for peahen and peacock crests. Each crest was tested three times and is denoted by a different shape symbol. The horizontal lines are the grand mean for each sex. (B-D) Variation in the spring constant was not explained by rachis length, number of feathers, or the area of pennaceous flags.

658

660

### **Acknowledgments**

662 We thank Robert Beyer, Maarten Hesselting, Robert Lukasik, Roger Hill, Kathy Kerran, and Jim Hare.

664

### **Competing interests**

666 The authors declare no competing or financial interests.

668

### **Author contributions**

670 Conceptualization: S.A.K.; Methodology: S.A.K., D.V.; Investigation: S.A.K., D.V.; Data curation: S.A.K., D.V., R.D.; Analysis: S.A.K., R.D., D.V.; Writing – original draft: S.A.K., R.D.; Writing – review & editing: S.A.K., R.D., D.V.

672

### **Funding**

674 This work was supported by Haverford College and a National Sciences and Engineering Research Council of Canada (NSERC) Postdoctoral Fellowship to R.D.

676

### **Data availability**

678 Data and analysis are available from Figshare at: <https://figshare.com/s/24beee4b025388e3e297>

680



## References

- 682  
684 **Alibardi, L.** (2009). Follicular patterns during feather morphogenesis in relation to the  
formation of asymmetric feathers, filoplumes and bristles. *Ital. J. Zool.* **76**, 279–290.
- 686 **Barth, F. G.** (2014). The Slightest Whiff of Air: Airflow Sensing in Arthropods. In *Flow  
Sensing in Air and Water*, pp. 169–196. Springer, Berlin, Heidelberg.
- 688 **Barth, F. G., Humphrey, J. A. C. and Srinivasan, M. V.** (2012). *Frontiers in Sensing: From  
Biology to Engineering*. Springer Science & Business Media.
- Bartoń, K.** (2015). *MuMIn 1.15.6*.
- 690 **Bilo, D. and Bilo, A.** (1978). Wind stimuli control vestibular and optokinetic reflexes in the  
pigeon. *Naturwissenschaften* **65**, 161–162.
- 692 **Bostwick, K. S., Elias, D. O., Mason, A. and Montealegre-Z, F.** (2009). Resonating feathers  
produce courtship song. *Proc. R. Soc. Lond. B Biol. Sci.* rspb20091576.
- 694 **Bradbury, J. W. and Vehrencamp, S. L.** (2011). *Principles of Animal Communication*.  
Sinauer.
- 696 **Brown, R. E. and Fedde, M. R.** (1993). Airflow sensors in the avian wing. *J. Exp. Biol.* **179**,  
13–30.
- 698 **Brücker, C., Schlegel, D. and Triep, M.** (2016). Feather vibration as a stimulus for sensing  
incipient separation in falcon diving flight. *Nat. Resour.* **7**, 411.
- 700 **Burley, N. T. and Symanski, R.** (1998). “A taste for the beautiful”: Latent aesthetic mate  
preferences for white crests in two species of Australian grassfinches. *Am. Nat.* **152**,  
702 792–802.
- 704 **Butler, J. M. and Maruska, K. P.** (2016). Mechanosensory signaling as a potential mode of  
communication during social interactions in fishes. *J. Exp. Biol.* **219**, 2781–2789.
- 706 **Childress, R. B. and Bennun, L. A.** (2002). Sexual character intensity and its relationship  
to breeding timing, fecundity and mate choice in the great cormorant *Phalacrocorax  
carbo lucidus*. *J. Avian Biol.* **33**, 23–30.
- 708 **Clark, C. J.** (2016). Locomotion-induced sounds and sonations: mechanisms,  
communication function, and relationship with behavior. In *Vertebrate Sound  
710 Production and Acoustic Communication*, pp. 83–117. Springer, Cham.
- 712 **Clark, G. A. and de Cruz, J. B.** (1989). Functional interpretation of protruding filoplumes in  
oscines. *The Condor* **91**, 962–965.
- 714 **Clark, C. J., Elias, D. O., Girard, M. B. and Prum, R. O.** (2013). Structural resonance and  
mode of flutter of hummingbird tail feathers. *J. Exp. Biol.* **216**, 3404–3413.

- Conover, M. R.** (2007). *Predator-Prey Dynamics: The Role of Olfaction*. CRC Press.
- 716 **Crawford, A. C. and Fettiplace, R.** (1985). The mechanical properties of ciliary bundles of  
turtle cochlear hair cells. *J. Physiol.* **364**, 359–379.
- 718 **Cummins, B. and Gedeon, T.** (2012). Assessing the Mechanical Response of Groups of  
Arthropod Filiform Flow Sensors. In *Frontiers in Sensing*, pp. 239–250. Springer,  
720 Vienna.
- 722 **Cunningham, S. J., Alley, M. R. and Castro, I.** (2011). Facial bristle feather histology and  
morphology in New Zealand birds: Implications for function. *J. Morphol.* **272**, 118–  
128.
- 724 **Dakin, R.** (2011). The crest of the peafowl: a sexually dimorphic plumage ornament signals  
condition in both males and females. *J. Avian Biol.* **42**, 405–414.
- 726 **Dakin, R. and Montgomerie, R.** (2009). Peacocks orient their courtship displays towards  
the sun. *Behav. Ecol. Sociobiol.* **63**, 825–834.
- 728 **Dakin, R., McCrossan, O., Hare, J. F., Montgomerie, R. and Kane, S. A.** (2016).  
Biomechanics of the peacock's display: How feather structure and resonance  
730 influence multimodal signaling. *PLOS ONE* **11**, e0152759.
- 732 **Dakin, R., van Beveren, D. and Amador Kane, S.** (2017). Statistical supplement to:  
Biomechanics of the peafowl's crest: a potential mechanosensory role for feathers  
during social displays.
- 734 **Dambach, M., Rausche, H.-G. and Wendler, G.** (1983). Proprioceptive feedback influences  
the calling song of the field cricket. *Naturwissenschaften* **70**, 417–418.
- 736 **Davis, A., Bouman, K. L., Chen, J. G., Rubinstein, M., Durand, F. and Freeman, W. T.**  
(2015). Visual vibrometry: estimating material properties from small motion in  
738 video. pp. 5335–5343.
- Fletcher, N. H.** (1992). *Acoustic Systems in Biology*. Oxford University Press.
- 740 **Fournier, J. P., Dawson, J. W., Mikhail, A. and Yack, J. E.** (2013). If a bird flies in the  
forest, does an insect hear it? *Biol. Lett.* **9**, 20130319.
- 742 **Freeman, A. R. and Hare, J. F.** (2011). Infrasound in the flutter-jump display of  
Capercaillie (*Tetrao urogallus*): signal or artefact? *J. Ornithol.* **152**, 815–816.
- 744 **Freeman, A. R. and Hare, J. F.** (2015). Infrasound in mating displays: a peacock's tale.  
*Anim. Behav.* **102**, 241–250.
- 746 **Garcia, M., Charrier, I. and Iwaniuk, A. N.** (2012). Directionality of the drumming display  
of the ruffed grouse. *The Condor* **114**, 500–506.

- 748 **Hagelin, J. C.** (2002). The kinds of traits involved in male—male competition: a comparison  
of plumage, behavior, and body size in quail. *Behav. Ecol.* **13**, 32–41.
- 750 **Hart, N. S.** (2002). Vision in the peafowl (Aves: *Pavo cristatus*). *J. Exp. Biol.* **205**, 3925–3935.
- 752 **Heffner, H. E., Koay, G., Hill, E. M. and Heffner, R. S.** (2013). Conditioned  
suppression/avoidance as a procedure for testing hearing in birds: The domestic  
pigeon (*Columba livia*). *Behav. Res. Methods* **45**, 383–392.
- 754 **Heffner, H. E., Koay, G. and Heffner, R. S.** (2016). Budgerigars (*Melopsittacus undulatus*)  
do not hear infrasound: the audiogram from 8 Hz to 10 kHz. *J. Comp. Physiol. A* **202**,  
756 853–857.
- 758 **Heidelbach, J. and Dambach, M.** (1997). Wing-flick signals in the courtship of the African  
cave cricket, *Phaeophilacris spectrum*. *Ethology* **103**, 827–843.
- 760 **Heinzel, H.-G. and Dambach, M.** (1987). Travelling air vortex rings as potential  
communication signals in a cricket. *J. Comp. Physiol. A* **160**, 79–88.
- 762 **Hill, E. M.** (2017). Audiogram of the mallard duck (*Anas platyrhynchos*) from 16 Hz to 9  
kHz. *J. Comp. Physiol. A* 1–6.
- 764 **Hill, E. M., Koay, G., Heffner, R. S. and Heffner, H. E.** (2014). Audiogram of the chicken  
(*Gallus gallus domesticus*) from 2 Hz to 9 kHz. *J. Comp. Physiol. A* **200**, 863–870.
- 766 **Hingee, M. and Magrath, R. D.** (2009). Flights of fear: a mechanical wing whistle sounds  
the alarm in a flocking bird. *Proc. R. Soc. Lond. B Biol. Sci.* rspb20091110.
- 768 **Hörster, W.** (1990). Vibrational sensitivity of the wing of the pigeon (*Columba livia*) — a  
study using heart rate conditioning. *J. Comp. Physiol. A* **167**, 545–549.
- 770 **Imber, M. J.** (1971). Filoplumes of petrels and shearwaters. *N. Z. J. Mar. Freshw. Res.* **5**, 396–  
403.
- 772 **James, P. C.** (1986). The filoplumes of the Manx Shearwater *Puffinus puffinus*. *Bird Study*  
**33**, 117–120.
- 774 **Jones, I. L. and Montgomerie, R.** (1992). Least auklet ornaments: do they function as  
quality indicators? *Behav. Ecol. Sociobiol.* **30**, 43–52.
- 776 **Kämper, G. and Dambach, M.** (1981). Response of the cercus-to-giant interneuron system  
in crickets to species-specific song. *J. Comp. Physiol.* **141**, 311–317.
- 778 **Larsen, O. N. and Wahlberg, N.** (2017). Sound and Sound Sources. In *Comparative*  
*Bioacoustics: An Overview* (ed. Brown, C.) and Riede, T.), pp. 3–61. Sharjah, UAE:  
Bentham Science Publishers.

- 780 **Lieser, M., Berthold, P. and Manley, G. A.** (2005). Infrasound in the capercaillie (*Tetrao urogallus*). *J. Ornithol.* **146**, 395–398.
- 782 **Lieser, M., Berthold, P. and Manley, G. A.** (2006). Infrasound in the flutter jumps of the  
784 capercaillie (*Tetrao urogallus*): apparently a physical by-product. *J. Ornithol.* **147**,  
507–509.
- 786 **Lo'fvenberg, J. and Johansson, R. S.** (1984). Regional differences and interindividual  
variability in sensitivity to vibration in the glabrous skin of the human hand. *Brain Res.* **301**, 65–72.
- 788 **Lucas, A. M. and Stettenheim, P. R.** (1972). Structure of Feathers. In *Avian Anatomy: Integument*, pp. 341–419. Washington, DC: US Department of Agriculture.
- 790 **Lunichkin, A. M., Zhemchuzhnikov, M. K. and Knyazev, A. N.** (2016). Basic elements of  
792 behavior of the cricket *Phaeophilacris bredoides* Kaltenbach (Orthoptera, Gryllidae).  
*Entomol. Rev.* **96**, 537–544.
- 794 **Mack, A. L., Jones, J. and Nelson, D. A.** (2003). Low-frequency vocalizations by  
cassowaries (casuarius spp.). *The Auk* **120**, 1062–1068.
- 796 **Manley, G. A., Lieser, M. and Berthold, P.** (2011). Studies of infrasound production and  
perception by the Capercaillie (*Tetrao urogallus*): a reply to Freeman and Hare. *J. Ornithol.* **152**, 817–818.
- 798 **Markl, H.** (1983). Vibrational Communication. In *Neuroethology and Behavioral Physiology*,  
pp. 332–353. Springer, Berlin, Heidelberg.
- 800 **Mooney, T. A., Kaplan, M. B. and Lammers, M. O.** (2016). Singing whales generate high  
802 levels of particle motion: implications for acoustic communication and hearing? *Biol. Lett.* **12**, 20160381.
- 804 **Nakagawa, S. and Schielzeth, H.** (2010). Repeatability for Gaussian and non-Gaussian  
data: a practical guide for biologists. *Biol. Rev.* **85**, 935–956.
- 806 **Nakagawa, S. and Schielzeth, H.** (2013). A general and simple method for obtaining R<sup>2</sup>  
from generalized linear mixed-effects models. *Methods Ecol. Evol.* **4**, 133–142.
- 808 **Necker, R.** (1985). Observations on the function of a slowly-adapting mechanoreceptor  
associated with filoplumes in the feathered skin of pigeons. *J. Comp. Physiol. A* **156**,  
391–394.
- 810 **Ota, N., Gahr, M. and Soma, M.** (2015). Tap dancing birds: the multimodal mutual  
812 courtship display of males and females in a socially monogamous songbird. *Sci. Rep.*  
**5**.

- 814 **Persons, W. S. and Currie, P. J.** (2015). Bristles before down: A new perspective on the  
functional origin of feathers. *Evolution* **69**, 857–862.
- 816 **Pinheiro, J., Bates, D., DebRoy, S. and Sarkar, D.** (2017). *nlme 3.1-131: linear and  
nonlinear mixed effects models*.
- 818 **R Core Team** (2017). *R 3.3.3: A Language and Environment for Statistical Computing*.  
Vienna, Austria: R Foundation for Statistical Computing.
- 820 **Russell, R. A.** (2011). Air vortex ring communication between mobile robots. *Robot. Auton.  
Syst.* **59**, 65–73.
- 822 **Santer, R. D. and Hebets, E. A.** (2008). Agonistic signals received by an arthropod filiform  
hair allude to the prevalence of near-field sound communication. *Proc. R. Soc. Lond.  
B Biol. Sci.* **275**, 363–368.
- 824 **Saxod, R.** (1978). Development of Cutaneous Sensory Receptors Birds. In *Development of  
Sensory Systems*, pp. 337–417. Springer, Berlin, Heidelberg.
- 826 **Seneviratne, S. S. and Jones, I. L.** (2008). Mechanosensory function for facial  
ornamentation in the whiskered auklet, a crevice-dwelling seabird. *Behav. Ecol.* **19**,  
828 784–790.
- 830 **Seneviratne, S. S. and Jones, I. L.** (2010). Origin and maintenance of mechanosensory  
feather ornaments. *Anim. Behav.* **79**, 637–644.
- 832 **Shimozawa, T., Murakami, J. and Kumagai, T.** (2003). Cricket wind receptors: thermal  
noise for the highest sensitivity known. In *Sensors and Sensing in Biology and  
Engineering*, pp. 145–157. Springer, Vienna.
- 834 **Smith, W. F.** (2010). *Waves and Oscillations: A Prelude to Quantum Mechanics*. Oxford  
University Press.
- 836 **Sofroniew, N. J. and Svoboda, K.** (2015). Whisking. *Curr. Biol.* **25**, R137–R140.
- 838 **Steinmann, T. and Casas, J.** (2017). The morphological heterogeneity of cricket flow-  
sensing hairs conveys the complex flow signature of predator attacks. *J. R. Soc.  
Interface* **14**, 20170324.
- 840 **Yorzinski, J. L., Patricelli, G. L., Babcock, J. S., Pearson, J. M. and Platt, M. L.** (2013).  
842 Through their eyes: selective attention in peahens during courtship. *J. Exp. Biol.* **216**,  
3035–3046.



**Figure 1**

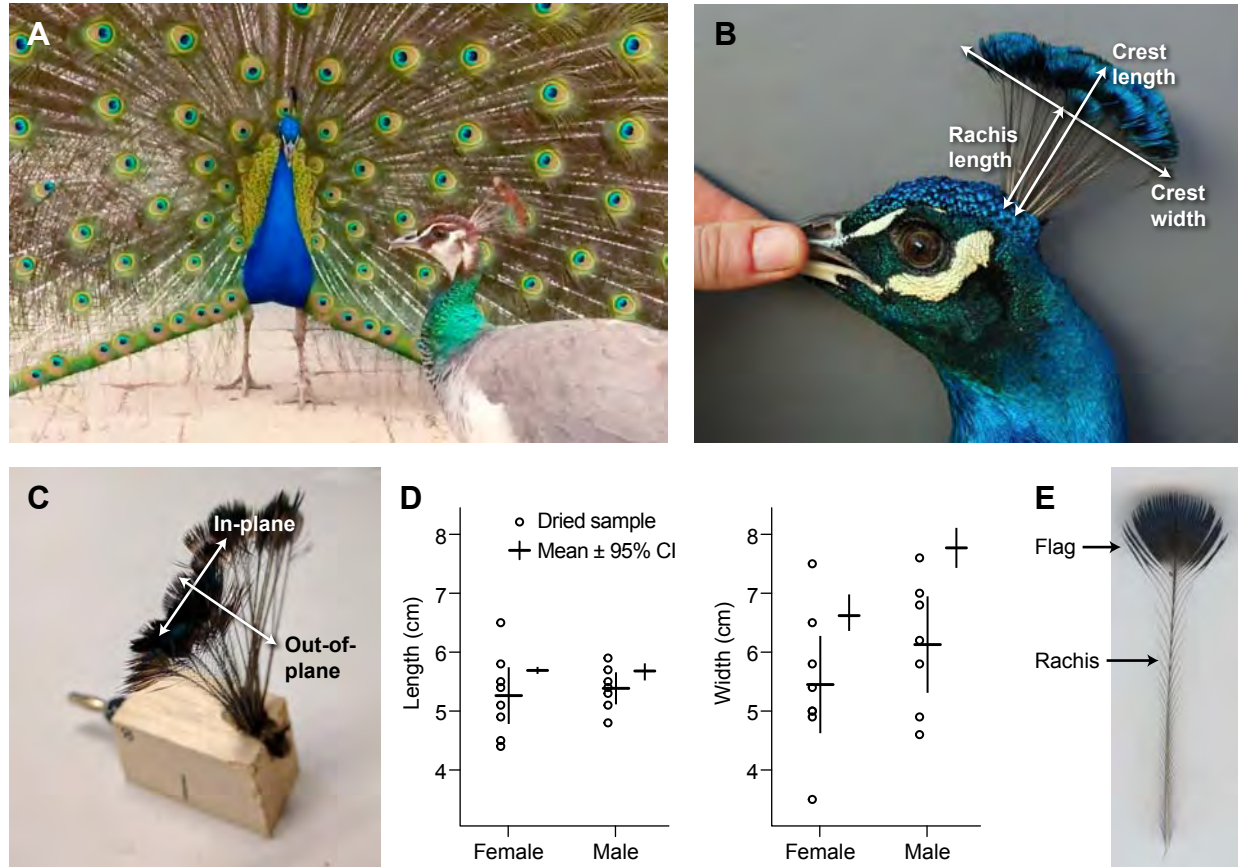



**Figure 2**

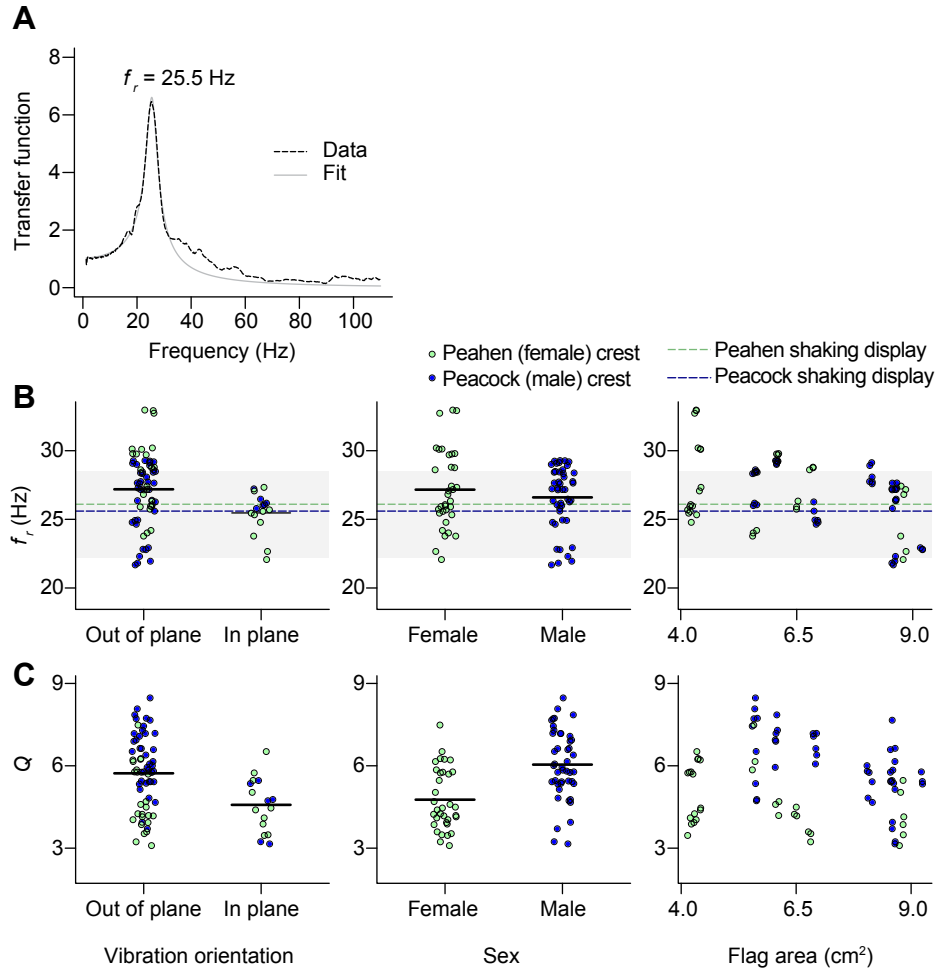

**Figure 3**

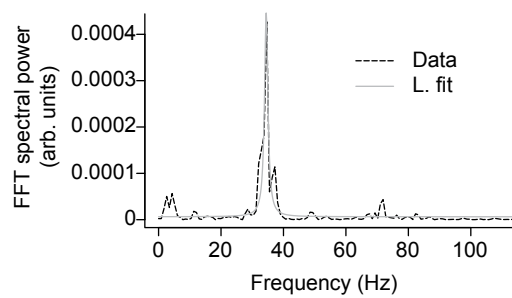

**Figure 4**

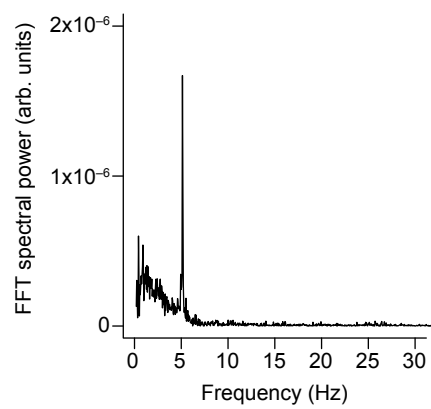

**Figure 5**

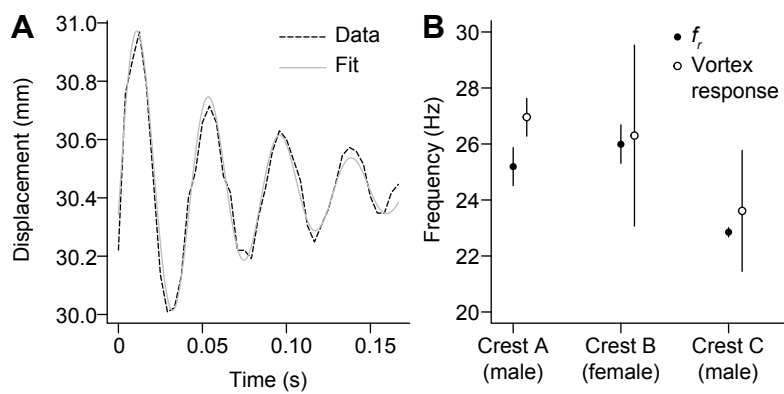

Source: https://www.biorxiv.org/content/10.1101/197525v1.full.pdf
